# Supplementary material for: One-step molten-salt synthesis of BaTi4O9 nanowires with oxygen deficiency-enhanced dielectric performance
Source: Royal Society of Chemistry journal article supplement (doi:10.1039/c3ra23175e), 2013-01-01
Supplement: c3ra23175e.pdf [file c3ra23175e.pdf]

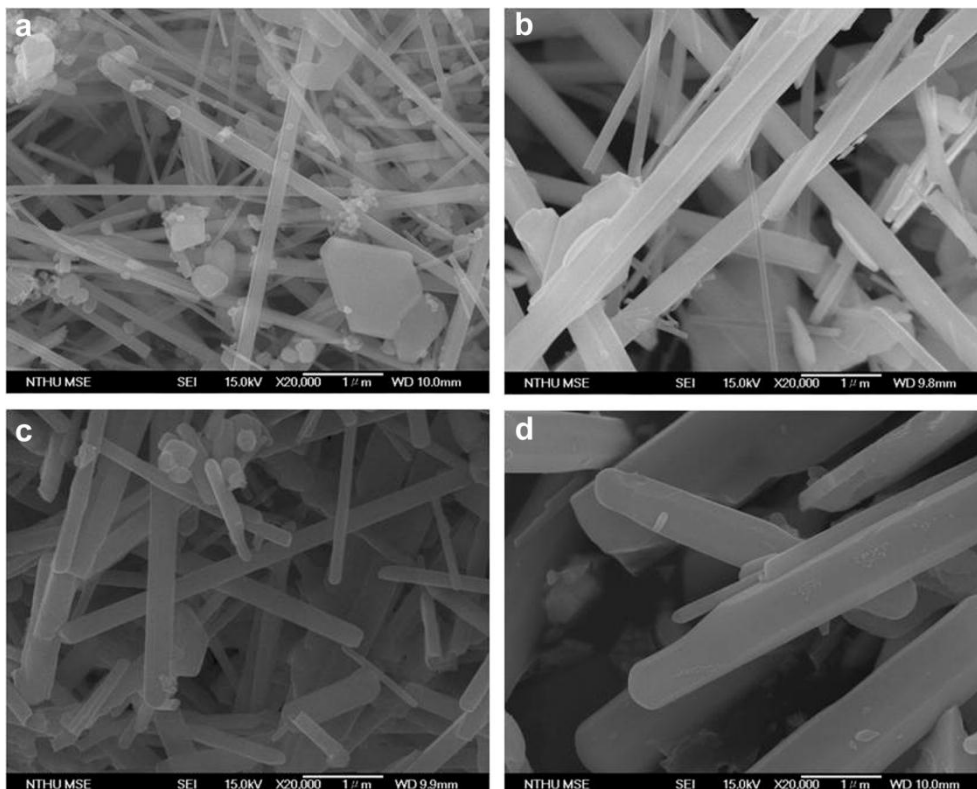

**Supporting Information 1** SEM images of one-step molten-salt synthesized BaTi<sub>4</sub>O<sub>9</sub> nanowires prepared with an NaCl-to-BaCl<sub>2</sub> ratio of 10:1 in different conditions: 750°C for (a) two and (b) six hours, and (c) 800 and (d) 900°C for two hours.

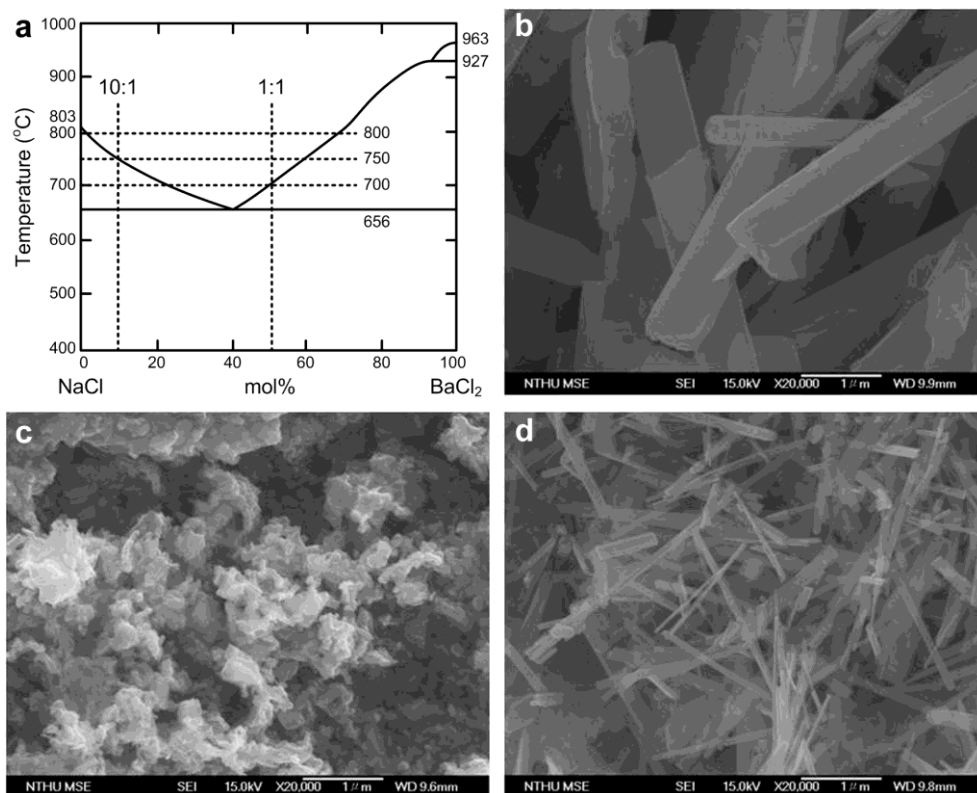

**Supporting Information 2** (a) NaCl-BaCl<sub>2</sub> phase diagram;<sup>25</sup> (b) SEM image of one-step molten-salt synthesized BaTi<sub>4</sub>O<sub>9</sub> nanowires prepared with an NaCl-to-BaCl<sub>2</sub> ratio of 1:1 at 800°C for two hours; SEM images of two-step synthesized products prepared at (c) 750 and (d) 800°C for two hours.

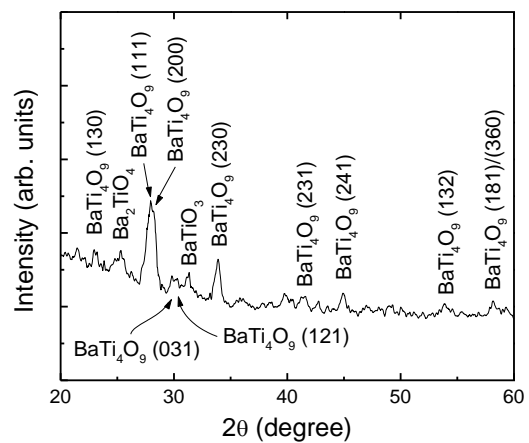

**Supporting Information 3** XRD pattern of one-step molten-salt synthesized BaTi<sub>4</sub>O<sub>9</sub> nanowires prepared with an NaCl-to-BaCl<sub>2</sub> ratio of 10:1 at 750°C for four hours.
